# Supplementary material for: Four Loss of Function Pathogenic Variants in ARHGAP29 in Non-Syndromic Cleft Lip and Palate
Source: Research Square preprint supplement (doi:10.21203/rs.3.rs-4557690/v1), 2024-07-15
Supplement: Supplementary file 1 [file c48900734fbabfc2f067162e.xlsx]

## Sheet: Sheet1
HGVS	ACMG in ClinVar/Varsome	Population of study	Inheritance	Phenotype	Method of sequencing	Penetrance	Functional study	Ref
c.2615C > T: p.Ala872Val	N.R/VUS	10 Chinese families	AD	NSCLP	ES	0.8	None	[11]
c.1654T>C: p.Ser552Pro	N.R/VUS	Chinese	AD	CP	ES	0.87	cell-based scratch assay Zebrafish Western Blotting	[16]
c.698-1G>C c.2109+1G>A c.1576+1G>A c.1475C>A: p.Ser492*	P/P P/P N.R/LP P/P	173 Brazilian probands and 15 from UK	AD	CL NSCLP	ES	0.59	None	[17]
c.1920+1G > A	P/P	Chinese	AD	CL NSCLP	ES	1	mRNA study	[18]
c.62_63delCT: p.S21Yfs*20 c.976A>T: p.Lys326* c.1865C>T: p.Thr622Met c.2533A>G: p.Ile845Val	N.R/VUS P/LP VUS/LB N.R/LB	872 cases and 802 controls US and Philippines	AD	CL NSCLP	Sequencing of nine exon (GWAS candidate region)	N.A	None	[7]
c.1939C>T: p.Arg647* c.2367G>A: p.Trp789* c.3118G>T: p.Gly1040*	N.R/LP N.R/LP N.R/VUS	1,409 Asian and European trios	AD	NSCLP	Sequencing of GWAS candidate regions	N.A	None	[14]
c. 94A>T: p. Lys32*	N.R/LP	60 Indian patients and 60 healthy control	AD	NSCLP	Sequencing of exon 1 (GWAS candidate region)	N.A	None	[13]
